# Supplementary material for: Endoscopic vacuum therapy in salvage and standalone treatment of gastric leaks after bariatric surgery
Source: Springer Nature journal article supplement (doi:10.1007/s00423-021-02365-9), 2021-11-17
Supplement: MOESM1 [file 19876182]

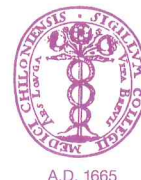

Universitäts-Kinderklinik · Schwanenweg 20 · 24105 Kiel

Dr. med. Markus Ahrens  
Klinik für Allgemeine, Visceral-, Thorax-,  
Transplantations- und Kinderchirurgie  
UKSH, Campus Kiel  
Arnold-Heller-Str. 3, Haus 18  
24105 Kiel

Postadresse:  
Arnold-Heller-Straße 3 / Haus 9  
D-24105 Kiel

Telefon 04 31 / 597-18 09  
Telefax 04 31 / 597-53 33  
ethikkomm@email.uni-kiel.de

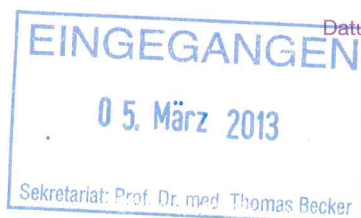

Datum: 25.02.2013

*MA Ahrens!*

**AZ: D 427/13**  
**Studienplan:**

(bitte stets angeben)

**Lebensqualitäts- und klinische Entwicklung nach konservativer und operativer Adipositas therapie**

Studienprotokoll, Fragebogen, Patienteninformation und Einwilligungserklärung

**Datum des Antrages:**

**Eingang 19.02.2013**

Sehr geehrter Herr Kollege Ahrens,

vielen Dank für Ihren obengenannten Antrag zur Beratung gemäß § 15 Berufsordnung (BO) der Ärztekammer Schleswig-Holstein.

Nach Durchsicht der Unterlagen durch die Geschäftsstelle und durch mich als Vorsitzenden der Ethik-Kommission bestehen gegen die Durchführung der Studie keine berufsethischen und berufsrechtlichen Bedenken.

Es wird darauf hingewiesen, dass künftige Änderungen des Antrages der Ethik-Kommission anzuzeigen sind und gegebenenfalls eine erneute Beratung erforderlich machen.

Nach Abschluss der Studie erbittet die Kommission einen kurzen Bericht mit einem Hinweis, ob im Laufe der Studie ethische oder juristische Probleme aufgetreten sind.

Mit freundlichen kollegialen Grüßen

  
Prof. Dr. med. H. M. Mehdorn  
Vorsitzender der Ethik-Kommission

  
Dr. med. Christine Glinicke  
Geschäftsführung der Ethik-Kommission
